# Supplementary material for: Gasdermin B expression predicts poor clinical outcome in HER2-positive breast cancer
Source: PubMed Central journal article supplement (PMC5302915; doi:10.18632/oncotarget.10787), 2016-07-22
Supplement: oncotarget-07-56295-s001.pdf [file oncotarget-07-56295-s001.pdf]

## Gasdermin B expression predicts poor clinical outcome in HER2-positive breast cancer

### Supplementary Materials

#### SUPPLEMENTARY METHODS

##### Generation of GSDMB antibody

Two BALB/c mice were intra-peritoneal injected (three times at 14-day intervals) with 100 µg of a peptide comprising amino acids 208–406 of the C-terminal region of a His-GSDMB fusion protein and complete Freund's adjuvant (Difco). A 150 µg booster of the recombinant His-GSDMB protein was injected intra-peritoneally, and fused three days later by conventional methods. The cell fusion partner was the NS-1 myeloma cell line (P3/NS1/1-Ag4-1). Hybridoma supernatants were screened by ELISA and by western blot using HEK-293T cells transfected with pCDNA3-HA-Gasdermin B plasmid. The monoclonal antibody (mAb; clone GAS120C, isotype IgG2b) was cloned by limiting dilution. Antibody purification was performed with a Hi-Trap Protein G column (GE Healthcare, UK). Animal experiments were performed under the experimental protocol approved by the Institutional

Committee for Care and Use of Animals (CEUCA 001/002). To confirm that the mAb recognized the human GSDMB protein, the HEK-293T cell line was transiently transfected with each of the GSDMB isoforms previously characterized [34]. Briefly, the HEK-293T cell line was transiently transfected with Lipofectamine 2000 (InvitroGen) and 4 µg of pEZ-M61 expression vectors (GeneCopoeia) containing the cDNA of each of the described GSDMB isoforms (isoform 1, NM\_001042471.1; isoform 2, NM\_018530.2; isoform 3 NM\_001165958.1; and isoform 4, NM\_001165959.1). After 48 h cells were lysed in RIPA buffer and 40 µg of total proteins were run in 15% SDS-PAGE Gels. Membranes were incubated overnight with the mouse monoclonal anti-GSDMB antibody described above (1:250 in 5% milk) and then with anti-mouse IgGs-HRP (1:5000; 1 h). Four bands matching the predicted size of each GSDMB isoform were detected. No additional (unspecific) bands were observed.

Staaf et al. JCO 2010 Dataset  
Breast cancer prognosis  
HER2-positive ( $n = 58$ )

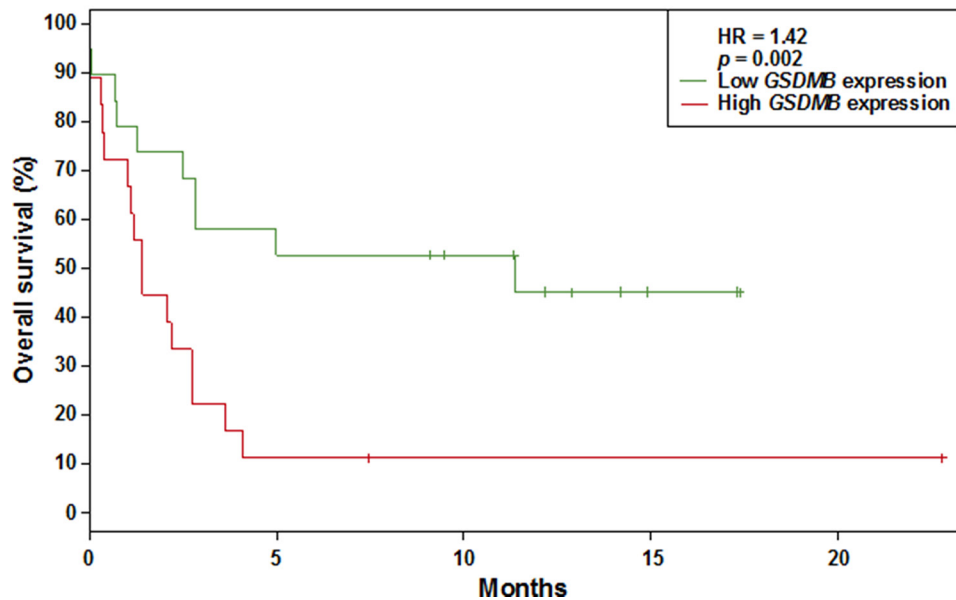

**Supplementary Figure S1: *GSDMB* over-expression is associated with poor overall survival in HER2-positive breast cancers.** Tumour samples with the top 25% mRNA expression levels of *GSDMB* gene (“high”, red) show significantly worse prognosis than the remaining tumors (“low”, green). Overall Survival curve in HER2-positive breast cancers patients from the Staaf dataset [38]. C Statistical differences, HR and  $p$ -value, were calculated via log-rank test.

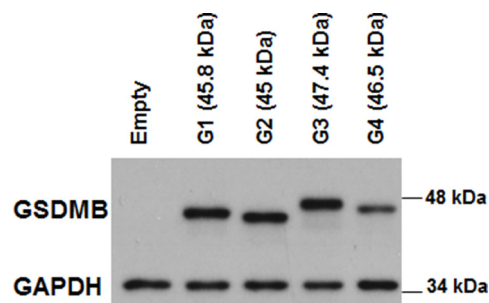

**Supplementary Figure S2: Anti-GSDMB antibody detects all GSDMB isoforms.** Western blot analysis of GSDMB using our specific monoclonal antibody in HEK293 cells with over-expression of the characterized GSDMB isoforms [35] (G1, NM\_001042471.1; G2, NM\_018530.2; G3, NM\_001165958.1; G4, NM\_001165959.1). GAPDH was used as a loading control. Four bands matching the predicted size of each GSDMB isoform were detected. No additional (unspecific) bands were observed.

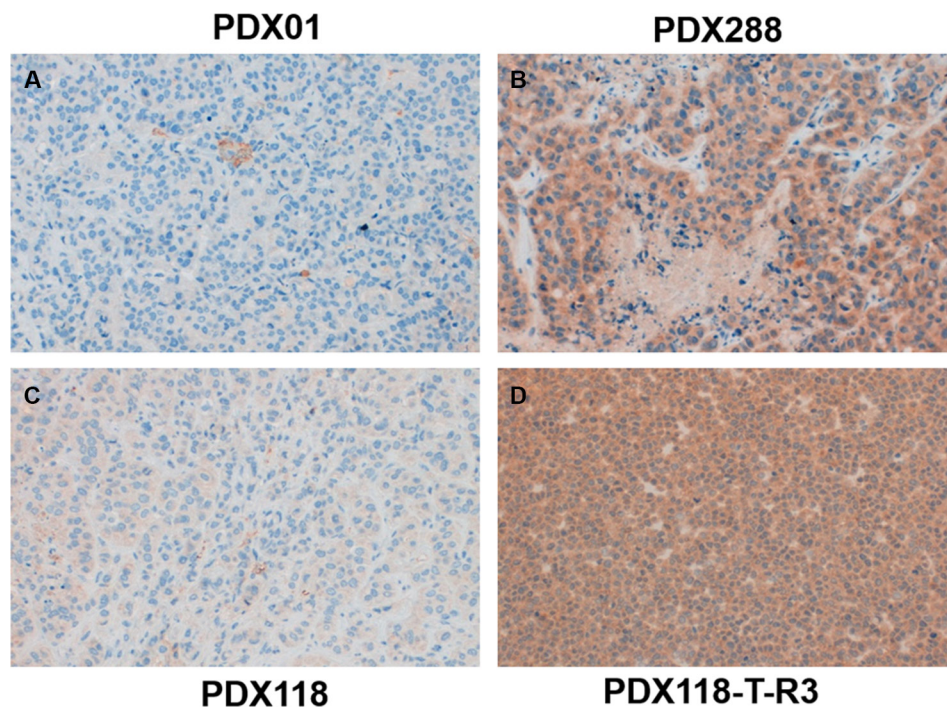

**Supplementary Figure S3: Immunohistochemical expression of GSDMB in breast cancer Patient Derived Xenografts (PDX).** (A) (PDX01): PDX derived from HER2-negative tumor; (B) (PDX288) and (C) (PDX118): HER2-positive cancers. PDX118 (c) was classified as sensitive and PDX288 (b) as resistant to *in vivo* trastuzumab treatment. (D) (PDX118T-R5): trastuzumab-resistant PDX originated from PDX118 (c) by chronic trastuzumab treatment *in vivo*. All the panels are shown at the same magnification x 20.

**Supplementary Table S1: High levels of GSDMB mRNA are associated with the HER2-positive phenotype in breast cancer microarray datasets**

| Dataset                         | Ur-Rehman 2013 ( <i>n</i> = 1570) <sup>a</sup> |                 | TCGA 2012 ( <i>n</i> = 526) <sup>b</sup> |               |
|---------------------------------|------------------------------------------------|-----------------|------------------------------------------|---------------|
| Parameter                       | GSDMB High                                     | GSDMB Low       | GSDMB High                               | GSDMB Low     |
| ER +                            | 163/702 (23%)                                  | 539/702 (77%)   | 94/401 (23%)                             | 307/401 (77%) |
| ER –                            | 81/207 (39%)                                   | 126/207 (61%)   | 38/125 (30%)                             | 87/125 (70%)  |
| X <sup>2</sup> <i>p</i> value   | <b><i>p</i> = 0.001</b>                        |                 | <i>P</i> = 0.125                         |               |
| PR +                            | 52/231 (22.5%)                                 | 179/231 (77.5%) | 69/340 (20%)                             | 271/340 (80%) |
| PR –                            | 12/53 (22.6%)                                  | 41/53 (77.4%)   | 63/186 (34%)                             | 123/186 (66%) |
| X <sup>2</sup> <i>p</i> value   | <i>p</i> = 0.9                                 |                 | <b><i>p</i> = 0.001</b>                  |               |
| Grade I                         | 17/153 (11%)                                   | 136/153 (89%)   | N/A                                      | N/A           |
| Grade II                        | 84/445 (19%)                                   | 361/445 (81%)   |                                          |               |
| Grade III                       | 126/372 (34%)                                  | 246/372 (66%)   |                                          |               |
| X <sup>2</sup> <i>p</i> value   | <b><i>p</i> = 0.001</b>                        |                 |                                          |               |
| LN +                            | 28/143 (19.6%)                                 | 115/143 (80.4%) | 77/258 (30%)                             | 181/258 (70%) |
| LN –                            | 242/946 (26%)                                  | 704/946 (74%)   | 55/268 (20%)                             | 213/268 (80%) |
| X <sup>2</sup> <i>p</i> value   | <i>p</i> = 0.145                               |                 | <b><i>p</i> = 0.016</b>                  |               |
| HER2+ IHC                       | 33/63 (52.4%)                                  | 30/63 (47.6%)   | 50/75 (67%)                              | 25/75 (33%)   |
| HER2 – IHC                      | 44/243 (18%)                                   | 199/243 (82%)   | 82/451 (18%)                             | 369/451 (82%) |
| X <sup>2</sup> <i>p</i> value   | <b><i>p</i> &lt; 0.001</b>                     |                 | <b><i>p</i> &lt; 0.001</b>               |               |
| Mol. Subtype (SAM) <sup>c</sup> | HER2<br><b><i>p</i> &lt; 0.001</b>             |                 | HER2<br><b><i>p</i> &lt; 0.001</b>       |               |
| ERBB2 Amp <sup>d</sup>          | N/A                                            | N/A             | 50/67 (75%)                              | 17/67 (25%)   |
| ERBB2 Norm                      |                                                |                 | 82/459 (18%)                             | 377/459 (82%) |
| X <sup>2</sup> <i>p</i> value   |                                                |                 | <b><i>p</i> &lt; 0.001</b>               |               |
| GSDMB Amp <sup>d</sup>          | N/A                                            | N/A             | 48/58 (83%)                              | 10/58 (17%)   |
| GSDMB Norm                      |                                                |                 | 84/468 (18%)                             | 384/468 (82%) |
| X <sup>2</sup> <i>p</i> value   |                                                |                 | <b><i>p</i> &lt; 0.001</b>               |               |

*In silico* analysis of GSDMB expression was performed in two independent gene expression datasets: <sup>a</sup> The Ur-Rehman dataset [36], a compilation of eight different studies performed on the HG-U133A Affymetrix platform, <sup>b</sup> TCGA (The Cancer Genome Atlas) study [37]. Normalized GSDMB expression was categorized as “high” when it was above the third quartile (top 25% expression) of all tumor samples; otherwise, it was considered “low”. Association of GSDMB levels with clinical and pathological features was tested by Chi-square (X<sup>2</sup>). <sup>c</sup> Tumors were classified within the different molecular subtypes using the PAM50 classifier [38], and the association of GSDMB-high tumors with any of these types was tested by SAM [39] using ROCK statistical tools. <sup>d</sup> Gene amplification (Amp) assessed by copy number aberration using Affymetrix 6.0 SNP arrays. Norm, normal (not amplified). In all statistical analyses a *p* value < 0.05 (considered significant) is highlighted in bold letters. ER, estrogen receptor; PR, progesterone Receptor; IHC, immunohistochemistry; N/A, data not available.

**Supplementary Table S2: Summary of clinical, pathological and immunohistochemical features of breast carcinomas included in discovery and validation series**

|                                         | Discovery series | Validation series |
|-----------------------------------------|------------------|-------------------|
|                                         | † <i>n</i> (%)   | † <i>n</i> (%)    |
| <b>Grade</b>                            |                  |                   |
| 1                                       | 5/53 (9.4)       | 11/95 (11.6)      |
| 2                                       | 25/53 (47.2)     | 26/95 (27.4)      |
| 3                                       | 23/53 (43.4)     | 58/95 (61.1)      |
| <b>Estrogen Receptor expression</b>     |                  |                   |
| Negative                                | 20/53 (37.7)     | 35/95 (36.8)      |
| Positive                                | 33/53 (62.3)     | 60/95 (63.2)      |
| <b>Progesterone Receptor expression</b> |                  |                   |
| Negative                                | 29/52 (55.8)     | 49/93 (52.7)      |
| Positive                                | 23/52 (44.2)     | 44/93 (47.3)      |
| <b>HER2 amplification</b>               |                  |                   |
| Negative                                | 24/53 (45.3)     | 0                 |
| Positive                                | 29/53 (54.7)     | 95 (100)          |
| <b>pCR*</b>                             |                  |                   |
| Responders                              | 17/29 (58.6)     | 58/95 (61.1)      |
| Non-responders                          | 12/29 (41.4)     | 37/95 (38.9)      |
| <b>Relapse*</b>                         |                  |                   |
| No                                      | 21/26 (80.8)     | 47/66 (71.2)      |
| Yes                                     | 5/26 (19.2)      | 19/66 (28.8)      |

The data make reference to the available cases for each marker. †*n* (%), number of analyzed cases and (percentage). \*pCR: pathological complete response when there is no invasive presence of tumour at the breast or ganglia level and Relapse as local or distant recurrence in HER2-positive tumours.

**Supplementary Table S3: GSDMB immunohistochemical expression and gene amplification (FISH) in HER2-positive breast carcinomas (*n* = 95) included in the validation series**

|                                            | Validation series |
|--------------------------------------------|-------------------|
|                                            | * <i>n</i> (%)    |
| <b>GSDMB amplification (<i>n</i> = 95)</b> |                   |
| Negative                                   | 37 (38.9)         |
| Positive                                   | 58 (61.1)         |
| <b>GSDMB expression (<i>n</i> = 93)</b>    |                   |
| Negative                                   | 29 (31.2)         |
| Positive                                   | 64 (68.8)         |

\**n* (%), number of analyzed cases and (percentage).

**Supplementary Table S4: Summary of clinical, pathological and immunohistochemical features of breast carcinomas series treated with adjuvant regimens (*n* = 138)**

|                                                          | <sup>†</sup> <i>n</i> (%) |
|----------------------------------------------------------|---------------------------|
| <b>Grade (<i>n</i> = 138)</b>                            |                           |
| 1                                                        | 19 (13.8)                 |
| 2                                                        | 59 (42.8)                 |
| 3                                                        | 60 (43.4)                 |
| <b>Estrogen receptor expression (<i>n</i> = 104)</b>     |                           |
| Negative                                                 | 45 (43.3)                 |
| Positive                                                 | 59 (56.7)                 |
| <b>Progesterone receptor expression (<i>n</i> = 127)</b> |                           |
| Negative                                                 | 41 (32.3)                 |
| Positive                                                 | 86 (67.7)                 |
| <b>HER2 amplification (<i>n</i> = 129)</b>               |                           |
| Negative                                                 | 76 (58.9)                 |
| Positive                                                 | 53 (41.1)                 |
| <b>GSDMB expression (<i>n</i> = 133)</b>                 |                           |
| Negative                                                 | 100 (75.2)                |
| Positive                                                 | 33 (24.8)                 |
| <b>Lymph node metastasis (<i>n</i> = 46)*</b>            |                           |
| Negative                                                 | 22(44.9)                  |
| Positive                                                 | 27 (55.1)                 |
| <b>Distant metastasis (<i>n</i> = 46)*</b>               |                           |
| Negative                                                 | 30 (65.2)                 |
| Positive                                                 | 16 (34.8)                 |

\*Only evaluated in HER2-positive breast carcinomas. <sup>†</sup>*n* (%), number of analyzed cases and (percentage).
